# Supplementary material
Source: publisher site journal article supplement (https://www.dovepress.com/get_supplementary_file.php?f=461490.docx)
Supplement: Supplementary file 1 [file get_supplementary_file.php]

**Supplemental Table 1. Odds Ratios (OR) and 95% Confidence Intervals (CI) from Multivariable Logistic Regressions Evaluating the Association of DM with Age-eligible Cancer Screening Adherence Adjusting for Other Characteristics**a

| **Characteristics** | **PAP test within 3 years (N=659)** | | **Mammogram within 2 years (N=334)** | |
| --- | --- | --- | --- | --- |
| **Model 1**b | **Model 2** b | **Model 1** b | **Model 2** b |
| **OR (95% CI)** | | | |
| **Diabetes (P Value)** | **0.534** | **0.500** | **0.256** | **0.250** |
| No | Ref. | Ref. | Ref. | Ref. |
| Yes | 1.20 (0.64,2.26) | 1.23 (0.65,2.33) | 1.56 (0.67,3.65) | 1.57 (0.68,3.64) |
| **Race (P Value)** | **0.563** | **0.556** | **0.121** | **0.116** |
| White | Ref. | Ref. | Ref. | Ref. |
| Non-white | 1.12 (0.69,1.83) | 1.14 (0.70,1.85) | 2.09 (0.80,5.46) | 2.11 (0.81,5.49) |
| **Education (P Value)** | **0.286** | **0.357** | **0.450** | **0.465** |
| HS/Some college | Ref. | Ref. | Ref. | Ref. |
| College graduate | 1.31 (0.78,2.19) | 1.25 (0.74,2.09) | 1.00 (0.44,2.28) | 0.94 (0.40,2.17) |
| **BMI (P Value)** | **0.218** | **0.255** | **0.166** | **0.198** |
| Underweight/Normal | Ref. | Ref. | Ref. | Ref. |
| Overweight/Obese | 0.75 (0.47,1.18) | 0.76 (0.48,1.21) | 0.54 (0.22,1.31) | 0.54 (0.21,1.39) |
| **Have regular provider (P Value)** | **0.108** | **0.105** | **0.529** | **0.557** |
| No | Ref. | Ref. | Ref. | Ref. |
| Yes | 1.41 (0.90,2.23) | 1.43 (0.90,2.25) | 0.85 (0.41,1.76) | 0.86 (0.39,1.87) |
| **Age (P Value)** | **0.341** | **0.333** | **0.116** | **0.142** |
| **Age** | 1.01 (0.99,1.03) | 1.01 (0.99,1.03) | 1.04 (0.98,1.10) | 1.04 (0.98,1.10) |
| PROMIS-Deaf Profile Communication Health **(P Value)** |  | **0.388** |  | **0.283** |
| PROMIS-Deaf Profile Communication Health |  | 1.01 (0.98,1.04) |  | 1.02 (0.98,1.06) |
| PROMIS-Deaf Profile Global Health (**P Value**) |  | **0.615** |  | **0.487** |
| PROMIS-Deaf Profile Global Health |  | 1.00 (0.97, 1.03) |  | 0.99 (0.94,1.04) |

PROMIS: Patient Reported Outcome Measurement System

aResults from 30 multiply imputed datasets.

bModel 1 does not include the QoL scores; Model 2 includes both the QoL score.
